# Supplementary material for: Insight of transcriptional regulators reveals the tolerance mechanism of carpet-grass (Axonopus compressus) against drought
Source: BMC Plant Biol. 2021 Feb 2;21:71. doi: 10.1186/s12870-021-02844-7 (PMC7851936; doi:10.1186/s12870-021-02844-7)
Supplement: Supplementary file 3 — Additional file 3. [file 12870_2021_2844_MOESM3_ESM.xlsx]

## Sheet: Sheet 1
Ontology
